# Supplementary material
Source: bioRxiv or medRxiv preprint supplement (https://medrxiv.org/highwire/filestream/89735/field_highwire_adjunct_files/0/2020.07.15.20154443-1.pdf)
Supplement: Supplementary file [file 2020.07.15.20154443-1.pdf]

1 **Supplemental Material.**

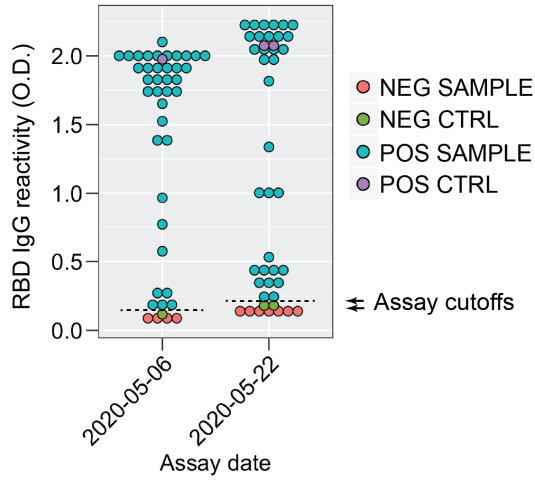

2

3 **Figure S1. Determination of RBD IgG reactivity by assay date.** Optical density (O.D.) at 405

4 nm with known positive and pre-2019 serum samples is presented.

**A**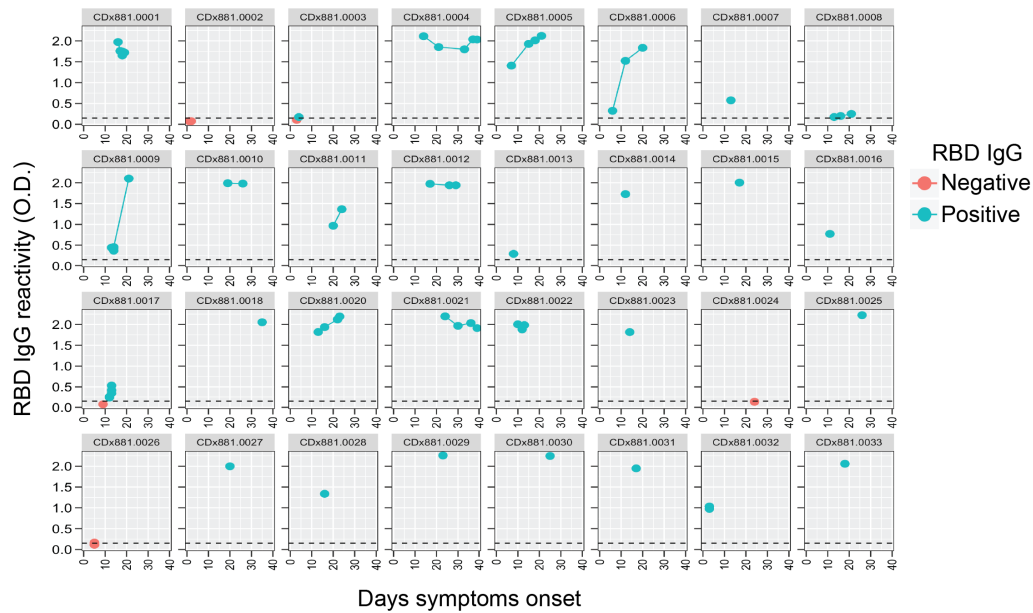**B**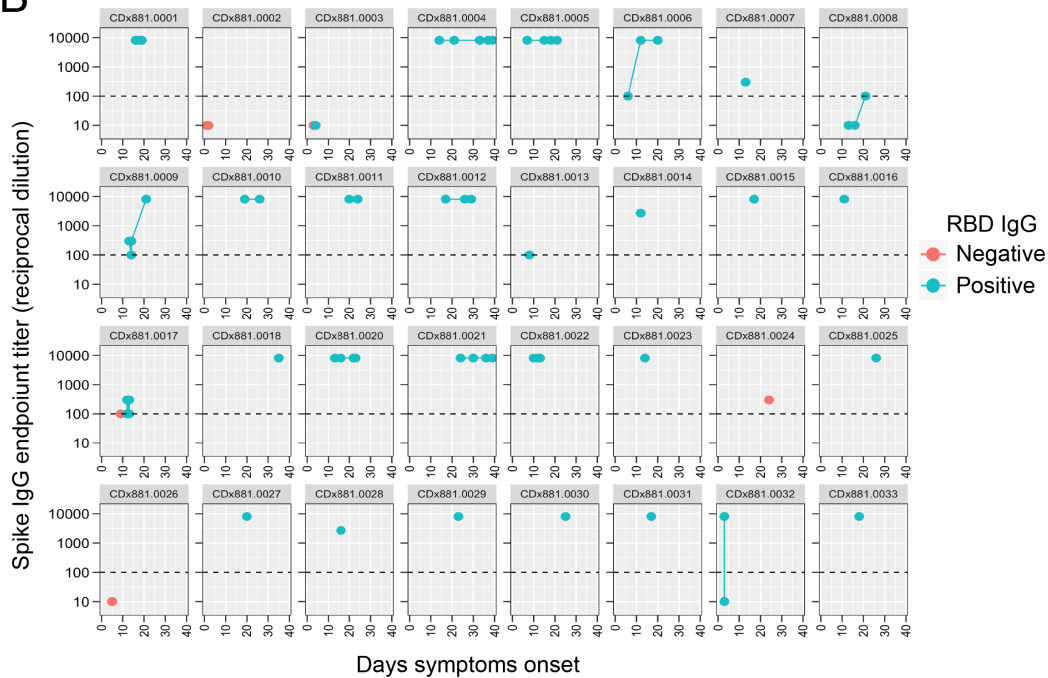

5

6 **Figure S2 | RBD-S and spike IgG responses in COVID-19 patients. (A)** RBD-IgG reactivity

7 for each patient by timepoint after onset of symptoms was determined by ELISA. Values over

8 threshold (indicated by dashed line) are indicated as RBD-S-positive and those under threshold

9 as RBD-S-negative. **(B)** Patient-specific endpoint titers for spike IgG are plotted by day after

10 symptoms onset and according to RBD-S IgG positivity by timepoint.

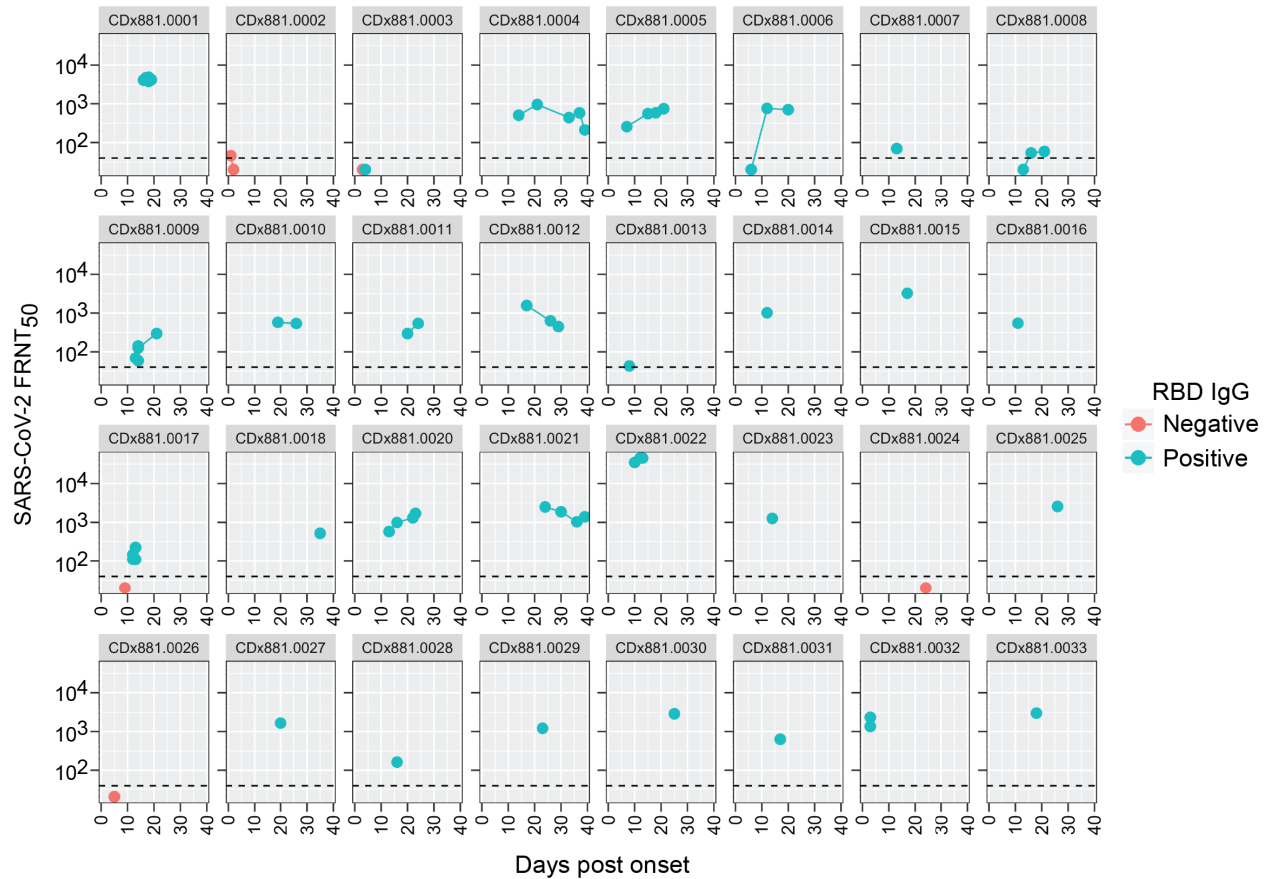

11  
 12 **Figure S3 | SARS-CoV-2 neutralization in COVID-19 patients.** Focus reduction (by 50%)  
 13 neutralization titers (FRNT<sub>50</sub>) was determined by serial dilution of serum samples from COVID-  
 14 19 patients taken at different times post onset of symptoms. RBD-IgG reactivity is indicated for  
 15 each sample. FRNT<sub>50</sub> cutoff is indicated by dotted line and was set at 1:50 which was the  
 16 lowest dilution tested. FRNT<sub>50</sub>-negative samples were assigned a titer of 1:20.

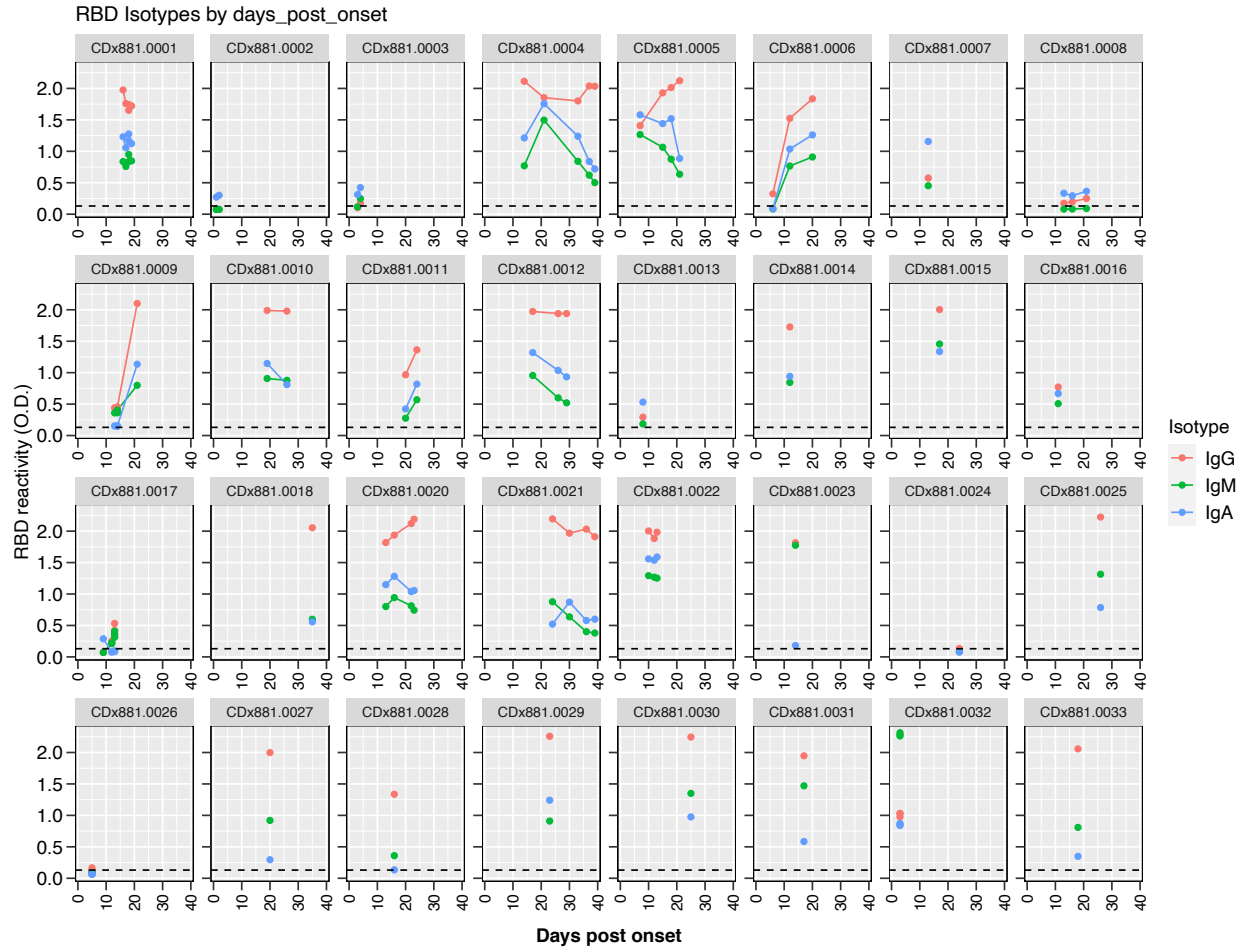

17

18 **Figure S4. | Spike IgG responses by antibody isotype in individual COVID-19 patients.**

19 Serum was diluted 1:100 and tested for spike reactivity by ELISA and OD 405nm is shown.

20

21 **Table S1 Reagents and Resources**

| <b>Reagent or Resource</b>                                                    | <b>Source</b>                                                                                                  | <b>Identifier</b>             |
|-------------------------------------------------------------------------------|----------------------------------------------------------------------------------------------------------------|-------------------------------|
| <b>Virus Strains</b>                                                          |                                                                                                                |                               |
| SARS-CoV-2 strain 2019-nCoV/USA_USA-WA1/2020 (WA1)                            | World Reference Center for Emerging Viruses and Arboviruses (WRCEVA) at the University of Texas Medical Branch | N/A                           |
| <b>Cell lines</b>                                                             |                                                                                                                |                               |
| African green monkey kidney cells (Vero E6)                                   | J. Lindsay Whitton, The Scripps Research Institute, La Jolla, CA                                               | N/A                           |
| <b>Antibodies</b>                                                             |                                                                                                                |                               |
| AffiniPure Goat Anti-Human IgG, Fcγ fragment specific                         | Jackson ImmunoResearch                                                                                         | 109-005-008, RRID: AB_2337534 |
| Peroxidase AffiniPure Goat Anti-Human IgG, Fcγ fragment specific              | Jackson ImmunoResearch                                                                                         | 109-035-008, RRID: AB_2337579 |
| Goat Anti-Human IgG (Fc specific), highly cross adsorbed-Alkaline Phosphatase | Sigma Millipore                                                                                                | SAB3701277                    |
| Goat Anti-Human IgM (μ-chain specific)-Alkaline Phosphatase                   | Sigma Millipore                                                                                                | A3437                         |
| Goat Anti-Human IgA (α-chain specific)-Alkaline Phosphatase                   | Sigma Millipore                                                                                                | A3400                         |
| <b>Biological Samples</b>                                                     |                                                                                                                |                               |
| Human Serum/Plasma samples                                                    | University of Vermont Medical Center Laboratories and Vaccine Testing Center                                   | N/A                           |
| <b>Recombinant DNA</b>                                                        |                                                                                                                |                               |
| pCAGGS-Recombinant SARS-CoV-2 Spike-His6-tagged                               | Dr. Florian Krammer, MSSM                                                                                      | also BEI resources #NR-52394  |
| pCAGGS-Recombinant (SARS-CoV-2 Spike receptor binding domain- His6 tagged     | Dr. Florian Krammer, MSSM                                                                                      | also BEI resources #NR-52309  |
| CR32022-HC                                                                    | Dr. Florian Krammer, MSSM                                                                                      | N/A                           |
| CR32022-LC                                                                    | Dr. Florian Krammer, MSSM                                                                                      | N/A                           |
| <b>Chemicals and proteins</b>                                                 |                                                                                                                |                               |
| Recombinant (SARS-CoV-2 Spike receptor binding domain- His6 tagged            | BEI Resources                                                                                                  |                               |
| p-Nitrophenyl phosphate                                                       | Sigma                                                                                                          | N2770                         |
| Zeocin                                                                        | Invivogen                                                                                                      | ant-zn-05                     |

|                            |           |           |
|----------------------------|-----------|-----------|
| Blasticidin                | Invivogen | ant-bl-05 |
| <b>Analysis Software</b>   |           |           |
| Graphpad 8.4.3 and R 3.6.1 |           |           |

22

23
